# Supplementary material for: Inhibition of protein N-myristoylation blocks Plasmodium falciparum intraerythrocytic development, egress and invasion
Source: PubMed Central journal article supplement (PMC8544853; doi:10.1371/journal.pbio.3001408), 2021-10-25

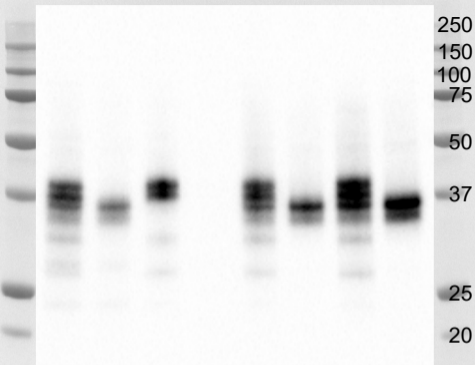

Fig 5A, Western blot of cell lysates with antibodies to GAP45, visualized with BioRad ChemiDoc system. The order of samples is as in Fig 5A. Molecular mass markers and their sizes (kDa) are superimposed.

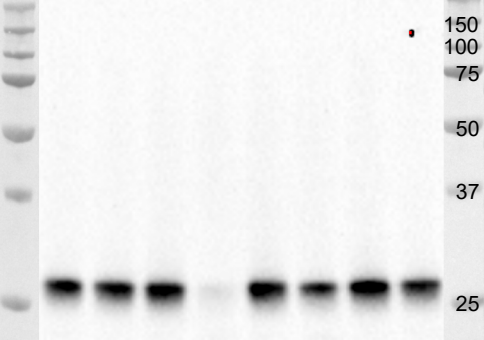

Fig 6B, Western blot of cell lysates with antibodies to MTIP, visualized with BioRad ChemiDoc system. The order of samples is as in Fig 6B. Molecular mass markers and their sizes (kDa), are superimposed.

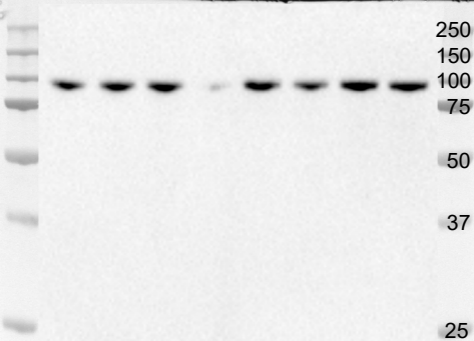

Fig 6B, Western blot of cell lysates with antibodies to MyoA, visualized with BioRad ChemiDoc system. The order of samples is as in Fig 6B. Molecular mass markers and their sizes (kDa), are superimposed.

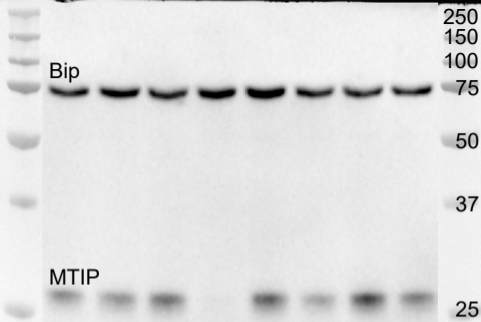

Fig 6B, Western blot of cell lysates with antibodies to Bip, visualized with BioRad ChemiDoc system. The order of samples is as in Fig 6B. Molecular mass markers and their sizes (kDa), are superimposed. (Previously probed with MTIP antibodies - as indicated.)

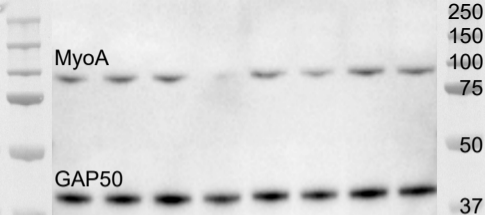

Fig 6B, Western blot of cell lysates with antibodies to GAP50, visualized with BioRad ChemiDoc system. The order of samples is as in Fig 6B. Molecular mass markers and their sizes (kDa), are superimposed. (Previously probed with MyoA antibodies - as indicated.)

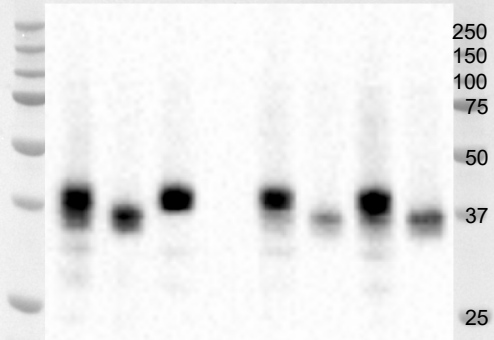

Fig 7A, Western blot of cell lysates with antibodies to GAP45, visualized with BioRad ChemiDoc system. The order of samples is as in Fig 7A, Lysate. Molecular mass markers and their sizes (kDa), are superimposed.

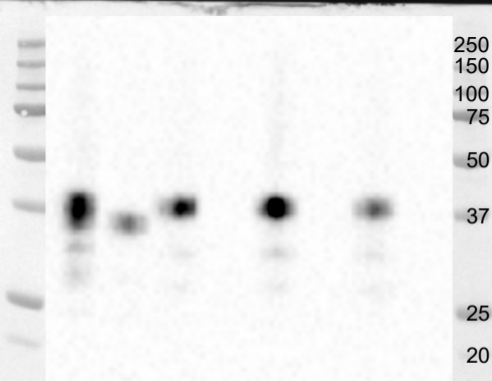

Fig 7A, Western blot of bound and eluted material with antibodies to GAP45, visualized with BioRad ChemiDoc system. The order of samples is as in Fig 7A, Bound and eluted. Molecular mass markers and their sizes (kDa), are superimposed.

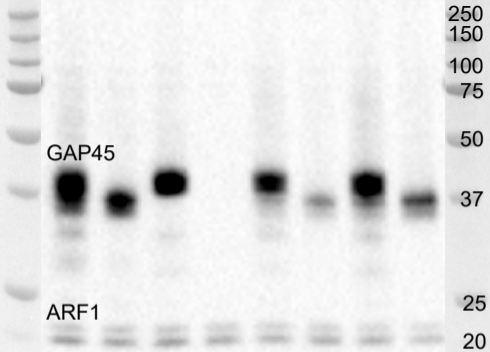

Fig 7A, Western blot of cell lysate with antibodies to ARF1, visualized with BioRad ChemiDoc system. The order of samples is as in Fig 7A, Lysate. Molecular mass markers and their sizes (kDa), are superimposed. (Previously probed with GAP45 antibodies - as indicated.)



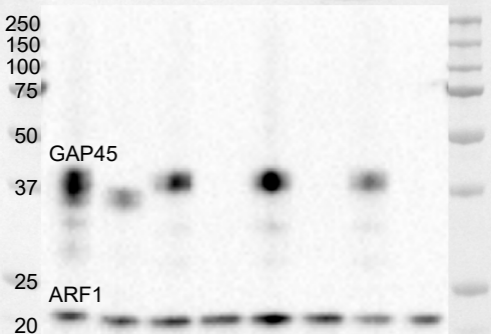

Fig 7A, Western blot of bound and eluted material with antibodies to ARF1, visualized with BioRad ChemiDoc system. The order of samples is as in Fig 7A, Bound and eluted. Molecular mass markers and their sizes (kDa), are superimposed. (Previously probed with GAP45 antibodies - as indicated.)

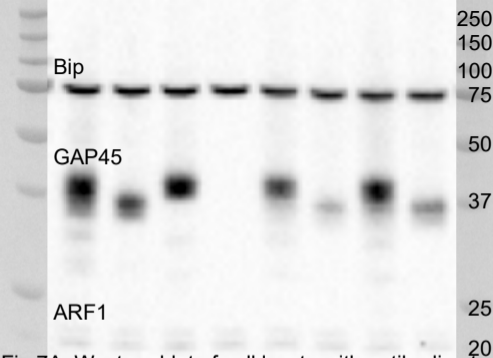

Fig 7A, Western blot of cell lysate with antibodies to Bip, visualized with BioRad ChemiDoc system. The order of samples is as in Fig 7A, Lysate. Molecular mass markers and their sizes (kDa), are super-imposed. (Previously probed with GAP45 and ARF1 antibodies - as indicated.)

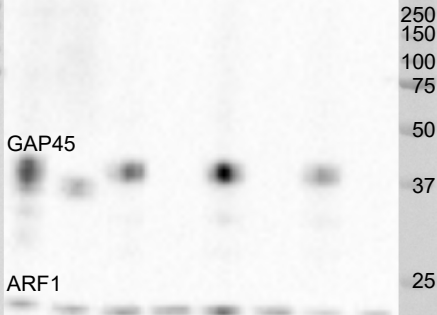

Fig 7A, Western blot of bound and eluted material with antibodies to Bip, visualized with BioRad Chemi Doc system. The order of samples is as in Fig 7A, Bound and eluted. Molecular mass markers and their sizes (kDa), are superimposed. (Previously probed with GAP45 and ARF1 antibodies.)

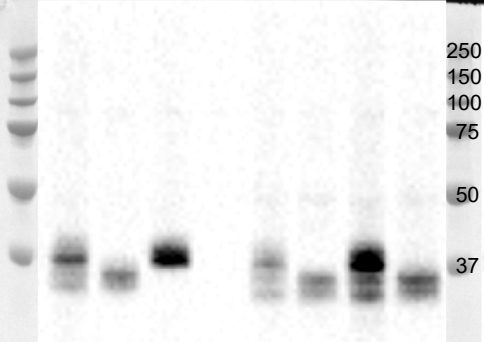

Fig 7B, Western blot of cell lysates with antibodies to GAP45, visualized with BioRad ChemiDoc system. The order of samples is as in Fig 7B, Lysate. Molecular mass markers and their sizes (kDa), are superimposed.

250  
150  
100  
75  
50  
37  
25  
20

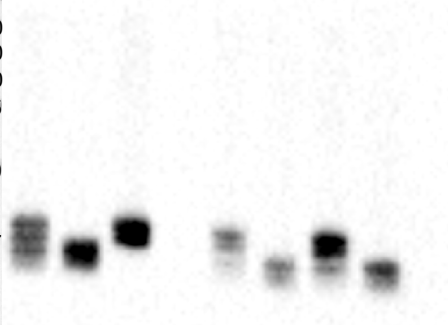

Fig 7B, Western blot of bound and eluted material with antibodies to GAP45, visualized with BioRad ChemiDoc system. The order of samples is as in Fig 7B, Bound and eluted. Molecular mass markers and their sizes (kDa), are superimposed.



CDPK1

GAP45

250

150

100

75

50

37

25

20

Fig 7B, Western blot of cell lysates with antibodies to CDPK1, visualized with BioRad ChemiDoc system. The order of samples is as in Fig 7B, Lysate. Molecular mass markers and their sizes (kDa), are superimposed. (Previously probed with GAP45 antibodies - as indicated.)

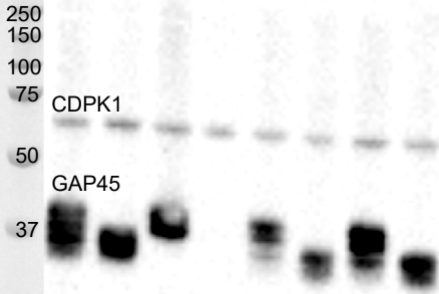

Fig 7B, Western blot of bound and eluted material with antibodies to CDPK1, visualized with BioRad ChemiDoc system. The order of samples is as in Fig 7B, Bound and eluted. Molecular mass markers and their sizes (kDa), are superimposed. (Previously probed with GAP45 antibodies - as indicated.)

HSP70

CDPK1

GAP45

250

150

100

75

50

37

25

Fig 7B, Western blot of cell lysates with antibodies to HSP70, visualized with BioRad ChemiDoc system. The order of samples is as in Fig 7B, Lysate. Molecular mass markers and their sizes (kDa), are superimposed. (Previously probed with CDPK1 and GAP45 antibodies - as indicated.)



250  
150  
100  
75  
50  
37  
25  
20

CDPK1  
GAP45

Fig 7B, Western blot of bound and eluted material with antibodies to HSP70, visualized with BioRad ChemiDoc system. The order of samples is as in Fig 7B, Bound and eluted. Molecular mass markers and their sizes (kDa), are superimposed. (Previously probed with CDPK1 and GAP45 antibodies - as indicated.)

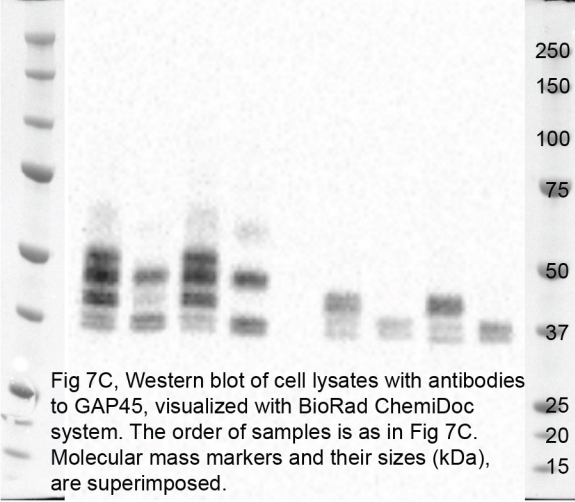

Fig 7C, Western blot of cell lysates with antibodies to GAP45, visualized with BioRad ChemiDoc system. The order of samples is as in Fig 7C. Molecular mass markers and their sizes (kDa), are superimposed.

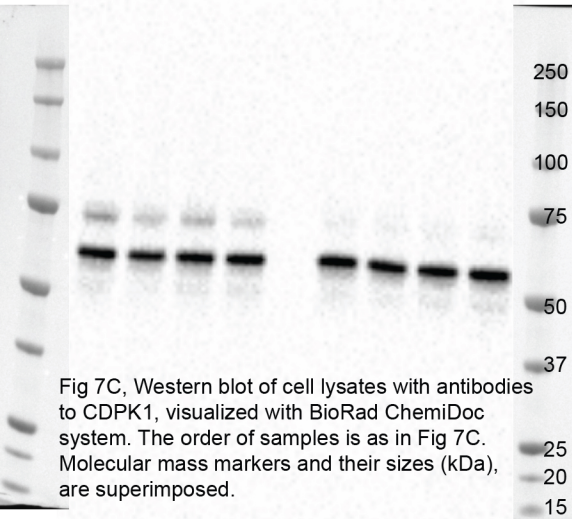

Fig 7C, Western blot of cell lysates with antibodies to CDPK1, visualized with BioRad ChemiDoc system. The order of samples is as in Fig 7C. Molecular mass markers and their sizes (kDa), are superimposed.

250 S2 Fig, Western blot of cell fractions  
150 with antibodies to GAP45, visualized  
100 with BioRad ChemiDoc system. The  
75 order of samples is as in S2 Fig 7B.  
Molecular mass markers and their  
50 sizes (kDa), are superimposed.

37  
25  
20  
15

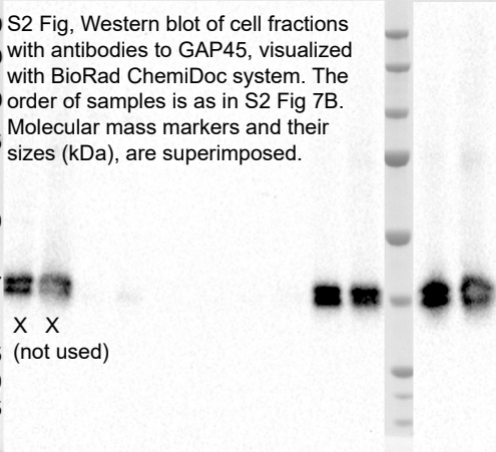

250 S2 Fig, Western blot of cell fractions  
150 with antibodies to CDPK1, visualized  
100 with BioRad ChemiDoc system. The  
75 order of samples is as in S2 Fig 7B.  
Molecular mass markers and their  
sizes (kDa), are superimposed.

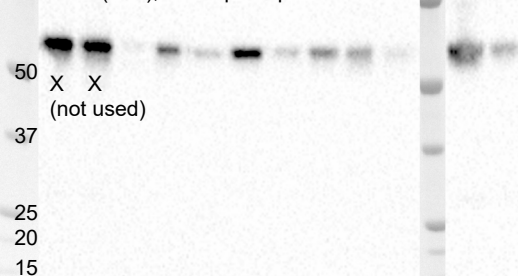

S2 Fig, Western blot of cell fractions with antibodies to ARO1, visualized with BioRad ChemiDoc system. The order of samples is as in S2 Fig 7B. Molecular mass markers and their sizes (kDa), are superimposed.

250  
150  
100  
75  
50  
37  
25  
20  
15

X X  
(not used)

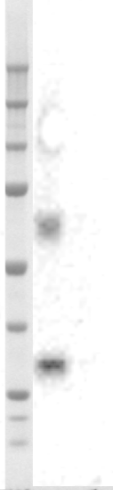

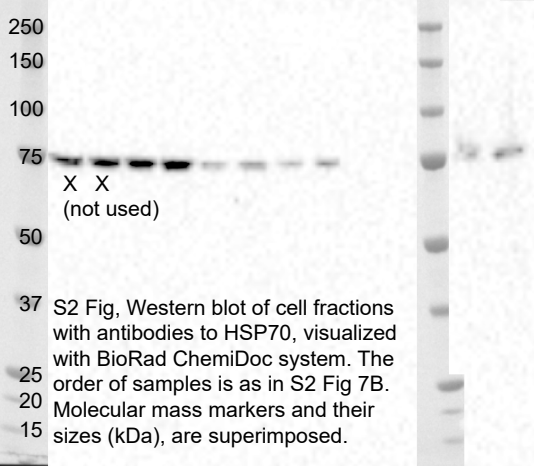

250 S2 Fig, Western blot of cell fractions  
150 with antibodies to MTIP, visualized  
100 with BioRad ChemiDoc system. The  
75 order of samples is as in S2 Fig 7B.  
Molecular mass markers and their  
50 sizes (kDa), are superimposed.

50

37

25

20

15

X X  
(not used)

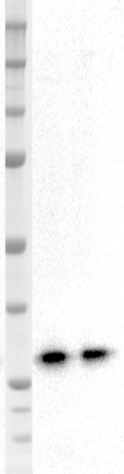



4000  
3000  
2500  
2000  
1500  
1000  
800  
600

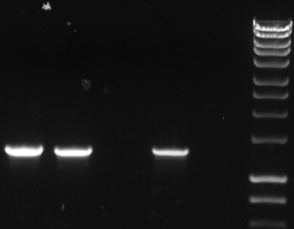

S5C Fig agarose gel analysis, sample order as in Fig. Size markers (bp) are indicated.

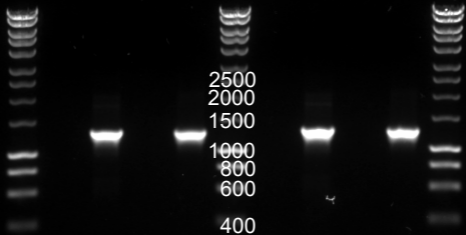

S5D Fig (top panel) agarose gel analysis, sample order as in Fig. Size markers (bp) are indicated.

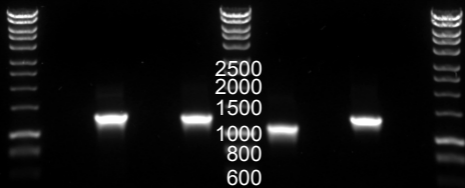

S5D Fig (lower panel) agarose gel analysis, sample order as in Fig. Size markers (bp) are indicated.

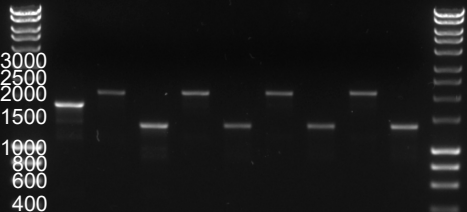

S6B Fig agarose gel analysis, sample order as in Fig. Size markers (bp) are indicated.

S6C Fig agarose gel analysis, sample order as in Fig. Size markers (bp) are indicated.

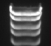

3000  
2500  
2000  
1500  
1000  
800  
600

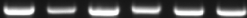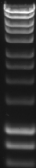

Supplement: pbio.3001408.s014.pdf [file pbio.3001408.s014.pdf]
