# Supplementary material for: Inhibition of protein N-myristoylation blocks Plasmodium falciparum intraerythrocytic development, egress and invasion
Source: PubMed Central journal article supplement (PMC8544853; doi:10.1371/journal.pbio.3001408), 2021-10-25
Supplement: pbio.3001408.s001.pdf [file pbio.3001408.s001.pdf]

**S1 Table. Guide RNA sequences**

| <b>Guide name</b>  | <b>Sequence</b>           |
|--------------------|---------------------------|
| ARO_G2A_Guide-01_F | ATTGATGGGAAATAATTGCTGTGC  |
| ARO_G2A_Guide-01_R | AAACGCACAGCAATTATTTCCCAT  |
| ARO_G2A_Guide-02_F | ATTGCTTCTGCTAAGTCTTGCTCA  |
| ARO_G2A_Guide-02_R | AAACTGAGCAAGACTTAGCAGAAG  |
| CDPK1_Guide_01_F   | ATTGAGGAGAAGTAAATTTACGAA  |
| CDPK1_Guide_01_R   | AAACTTCGTAAATTTACTTCTCCT  |
| CDPK1_Guide_02_F   | ATTGTTACGAATGGAAATAATTAT  |
| CDPK1_Guide_02_R   | AAACATAATTATTTCCATTCGTAA  |
| GAP45_Guide_02_F   | ATTGATGTTCAAGAAGCAAAGTAA  |
| GAP45_Guide_02_R   | AAACTTACTTTGCTTCTTGAACAT  |
| GAP45_Guide_03_R   | AAACAACGTAAAGATATTGATGAA  |
| GAP45_Guide_03_F   | ATTGTTTCAATATCTTTACGTT    |
| ISP3_Guide_01_F    | ATTGTTTCAGGACAATGAGATATA  |
| ISP3_Guide_01_R    | AAACTATATCTCATTGTCCTGAAA  |
| ISP3_Guide_02_F    | ATTGTAAGAGTGGAATAGTATAA   |
| ISP3_Guide_02_R    | AAACTTATACTATTTCCACTCTTA  |
| S9C_Guide_01_R     | AAACACTAATCTTCAGACCGCACC  |
| S9C_Guide_01_F     | ATTGGGTGCGGTCTGAAGATTAGT  |
| S9C_Guide_02_R     | AAACCACCCACCTAGCTATTCAAA  |
| S9C_Guide_02_F     | ATTGTTTGAATAGCTAGGTGGGTG  |
| TRP_Guide_01_F     | ATTGTGCATTCGGAAGTAAGAATT  |
| TRP_Guide_01_R     | AAACAATTCTTACTTCCGAATGCA  |
| TRP_Guide_02_F     | ATTGTTATGCTAGCATGAAATTGT  |
| TRP_Guide_02_R     | AAACACAATTTTCATGCTAGCATAA |
