# Supplementary material for: Inhibition of protein N-myristoylation blocks Plasmodium falciparum intraerythrocytic development, egress and invasion
Source: PubMed Central journal article supplement (PMC8544853; doi:10.1371/journal.pbio.3001408), 2021-10-25
Supplement: pbio.3001408.s002.pdf [file pbio.3001408.s002.pdf]

**S2 Table. Oligonucleotides used for PCR and sequence analysis**

| Name                  | Sequence                                                                   |
|-----------------------|----------------------------------------------------------------------------|
| ARO_Intg_F1           | TATTATACCGTTGCCTTTCAAATGGCGGG                                              |
| ARO_Intg_R1           | CATACATCTCTACCGGCGCAACAG                                                   |
| GAP45_Intg_F1         | aaacgtatggaagtgtaaaggg                                                     |
| GAP45_Intg_R1         | CTCGTCTATGCCTTTCTCTTTGGC                                                   |
| ISP3_Intg_F1          | GGAAAAAGTTTTATGTTTCAGTCTGAATATTACC                                         |
| ISP3_Intg_R1          | CTTTAATTGAGTTACCTGATTTGACTTGTTAATCC                                        |
| S9C_Intg_F1           | gaaatataaatacatgttaacacatagtataagataatacc                                  |
| S9C_Intg_R1           | TACTGTAACTTGAGGATGTGGCC                                                    |
| TRP_Intg_F1           | GAAAATACATTTCTTCTTAATTCATATTG                                              |
| TRP_Intg_R2           | CCACTTCTAATAACTTCATACTTGCG                                                 |
| CDPK1_Intg_F1         | cattttgatggcactgccttttgagg                                                 |
| CDPK1_Intg_R1         | ACCGTAGTTGTACCGTTTGTGAACCTTGACC                                            |
| CDPK1_WT_R1           | CCATTGTAATTTACTTCTCCTCG                                                    |
| ARO_WT_R1             | ATCTCTCCTGCACAGCAATTATTC                                                   |
| GAP45_WT_R1           | TTCATCAATATCTTTACGTTTGGGTTCC                                               |
| ISP3_WT_R1            | CTGAAATATATCTATATTTGATTTACTG                                               |
| S9C_WT_R1             | CTTTGAATAGCTAGGTGGGTGCGGTCTG                                               |
| TRP_WT_R1             | TTTCATGCTAGCATAATTGTAATACTCC                                               |
| ARO_MiSeq_F1          | TCGTCGGCAGCGTCAGATGTGTATAAGAGACAGTATTATACCGTTGCCTTTCAAATGGC                |
| ARO_MiSeq_R1          | GTCTCGTGGGCTCGGAGATGTGTATAAGAGACAGCATACATCTCTACCGGCGCAACAG                 |
| GAP45_MiSeq_F1        | TCGTCGGCAGCGTCAGATGTGTATAAGAGACAGtaaacgtatggaagtgtaaaggg                   |
| GAP45_MiSeq_R1.2      | GTCTCGTGGGCTCGGAGATGTGTATAAGAGACAGCTCGTCTATGTCCTTTCTCTTTGGC                |
| ISP3_MiSeq_F1         | TCGTCGGCAGCGTCAGATGTGTATAAGAGACAGGGAAAAAGTTTTATGTTTCAGTCTGAATATTACC        |
| ISP3_MiSeq_R1         | GTCTCGTGGGCTCGGAGATGTGTATAAGAGACAGCTTTAATTGAGTTACCTGATTTGACTTGTTAATCC      |
| S9C_MiSeq_F1          | TCGTCGGCAGCGTCAGATGTGTATAAGAGACAGgaaatataaatacatgttaacacatagtataagataatacc |
| S9C_MiSeq_R1          | GTCTCGTGGGCTCGGAGATGTGTATAAGAGACAGTTACTGTAACCTTGAGGATGTGGCC                |
| TRP_MiSeq_F1          | TCGTCGGCAGCGTCAGATGTGTATAAGAGACAGGAAAATACATTTCTTCTTAATTCATATTG             |
| TRP_MiSeq_R2          | GTCTCGTGGGCTCGGAGATGTGTATAAGAGACAGCCACTTCTAATAACTTCATACTTGCG               |
| CDPK1_MiSeq_F1        | TCGTCGGCAGCGTCAGATGTGTATAAGAGACAGgaaaaataaaatcgtagaaaatgtttccc             |
| CDPK1_MiSeq_R1        | GTCTCGTGGGCTCGGAGATGTGTATAAGAGACAGGTAGTTGTTACCGTTTGTGAACCTTGACC            |
| GAP45_MiSeq_F1.2      | TCGTCGGCAGCGTCAGATGTGTATAAGAGACAGtaaacgtatggaagtgtaaaggg                   |
| AJP_161               | gtgtatattaccttacatttatctcc                                                 |
| AJP_162               | tatgacttgctcactgctagtgtac                                                  |
| AJP_169               | gccaactgtagttgggtcatc                                                      |
| AJP_164               | cattcctaacacattatgtgtataaca                                                |
| AS_GAP45C_Intg_WT3UTR | gtcaggggattaaaataaaaatc                                                    |
| AJP_163               | ATTGAGCAGAGGATATGCGCATAATGGT                                               |
| G45_WTC_pbDT3_R       | GCACACAACATACACATTTTACAG                                                   |
| Integ_G45_3UTR_R      | gatttcgatgaaatttaatttttttaatc                                              |
| AJP_93                | tgtttaatacactgtgtaacctt                                                    |

Upper and lower case sequences are from exons and non-coding regions, respectively.
