# Supplementary material for: Inhibition of protein N-myristoylation blocks Plasmodium falciparum intraerythrocytic development, egress and invasion
Source: PubMed Central journal article supplement (PMC8544853; doi:10.1371/journal.pbio.3001408), 2021-10-25
Supplement: pbio.3001408.s003.pdf [file pbio.3001408.s003.pdf]

**S3 Table. Percentage of PEGylated and non-PEGylated protein in cell extracts measured by western blotting with anti-GAP45 and anti-CDPK1 antibodies. See Fig 7C**

| Protein      | Rapamycin     | Parasite line, % of protein signal    |                                        |    |    |
|--------------|---------------|---------------------------------------|----------------------------------------|----|----|
|              |               | <i>gap45:ha3:loxP::comp_gap45[WT]</i> | <i>gap45:ha3:loxP::comp_gap45[G2A]</i> |    |    |
|              |               | -                                     | +                                      | -  | +  |
| <b>GAP45</b> | 2-PEG-protein | 13                                    | 8                                      | 13 | 15 |
|              | 1-PEG-protein | 49                                    | 44                                     | 51 | 43 |
|              | protein       | 38                                    | 48                                     | 36 | 41 |
| <b>CDPK1</b> | 1-PEG-protein | 33                                    | 28                                     | 29 | 26 |
|              | protein       | 67                                    | 72                                     | 71 | 74 |
