# Supplementary material for: Inhibition of protein N-myristoylation blocks Plasmodium falciparum intraerythrocytic development, egress and invasion
Source: PubMed Central journal article supplement (PMC8544853; doi:10.1371/journal.pbio.3001408), 2021-10-25

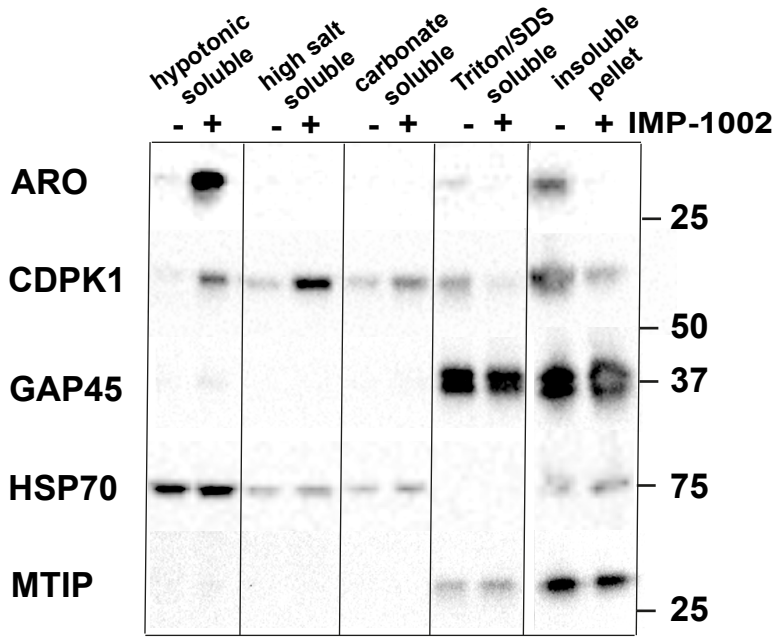

Supplement: pbio.3001408.s005.pdf [file pbio.3001408.s005.pdf]
