# Supplementary material for: Inhibition of protein N-myristoylation blocks Plasmodium falciparum intraerythrocytic development, egress and invasion
Source: PubMed Central journal article supplement (PMC8544853; doi:10.1371/journal.pbio.3001408), 2021-10-25

**A. Modified N-terminal peptide of metal-dependent protein phosphatase PPM6 (PF3D7\_1309200).**

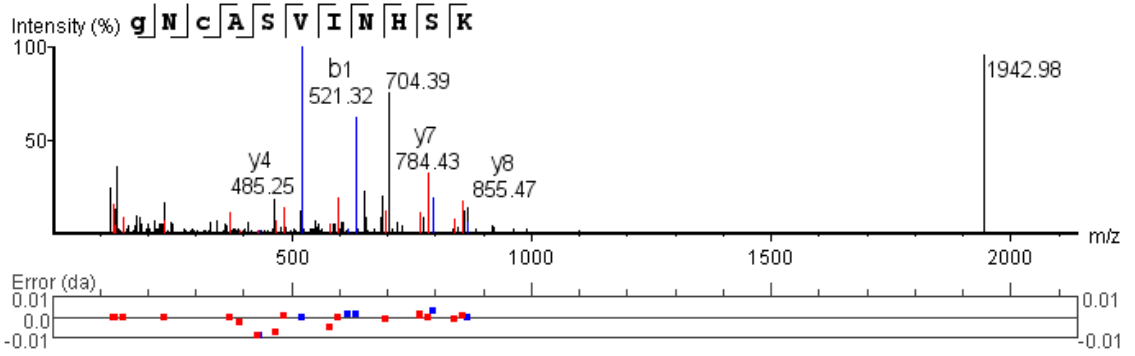

**B. Modified N-terminal peptide of acylated pleckstrin-homology domain containing protein (PF3D7\_0414600).**

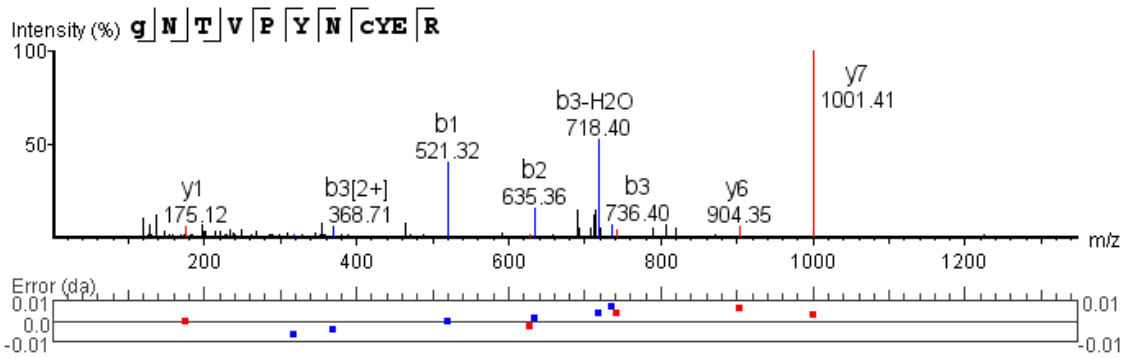

Supplement: pbio.3001408.s006.pdf [file pbio.3001408.s006.pdf]
