# Supplementary material for: Inhibition of protein N-myristoylation blocks Plasmodium falciparum intraerythrocytic development, egress and invasion
Source: PubMed Central journal article supplement (PMC8544853; doi:10.1371/journal.pbio.3001408), 2021-10-25
Supplement: pbio.3001408.s007.pdf [file pbio.3001408.s007.pdf]

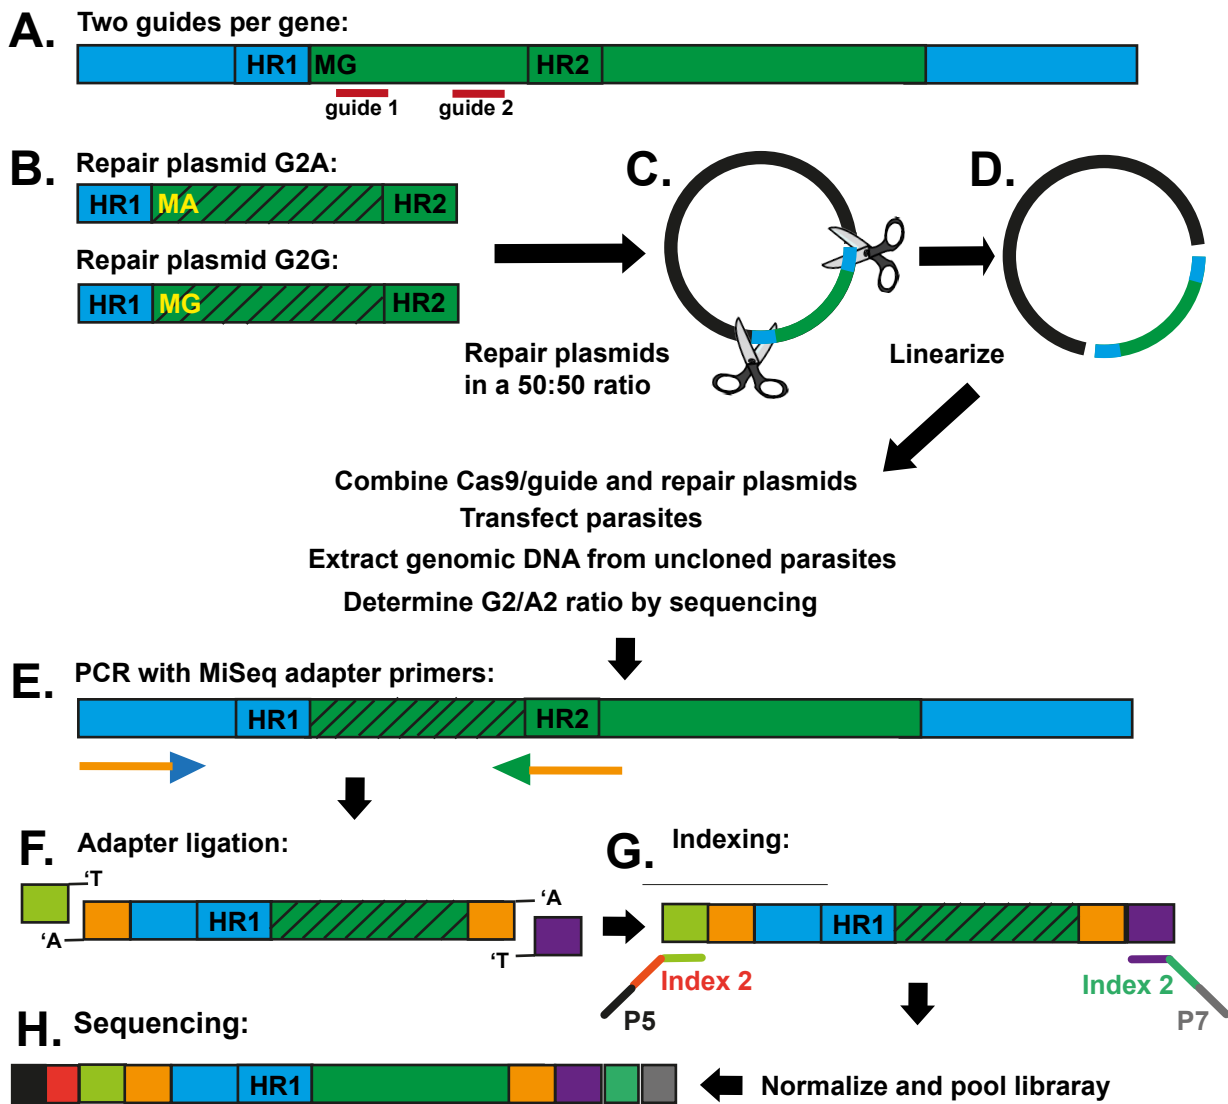

| Reads   | GAP45 | ARO  | CDPK1 | S9C  | TRP  | ISP3 |
|---------|-------|------|-------|------|------|------|
| Expt. 1 | 2267  | 2012 | 43    | 1452 | 2327 | 660  |
| Expt. 2 | 2184  | 2003 | 8     | 1809 | 2003 | 573  |
| Expt. 3 | 2403  |      |       |      |      |      |
