# Supplementary material for: Inhibition of protein N-myristoylation blocks Plasmodium falciparum intraerythrocytic development, egress and invasion
Source: PubMed Central journal article supplement (PMC8544853; doi:10.1371/journal.pbio.3001408), 2021-10-25

## A. Integration of second GAP45 gene into Pfs47

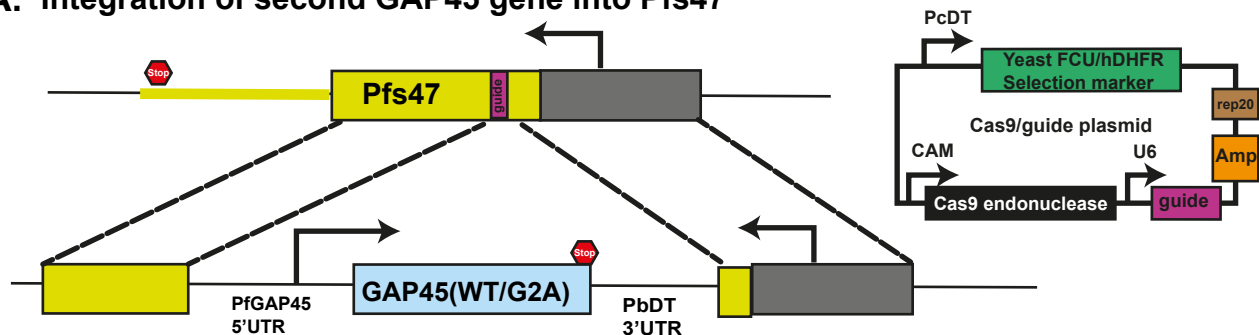

## B. PCR diagnostic of integration

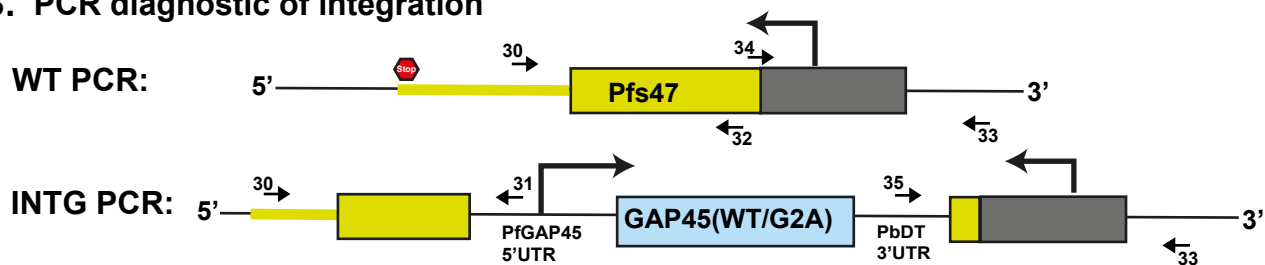

## C. Uncloned population:

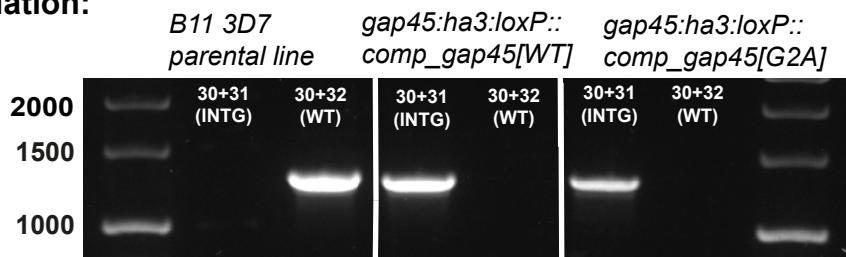

## D. Selected *gap45:ha3:loxP::comp\_gap45[G2A]* clones:

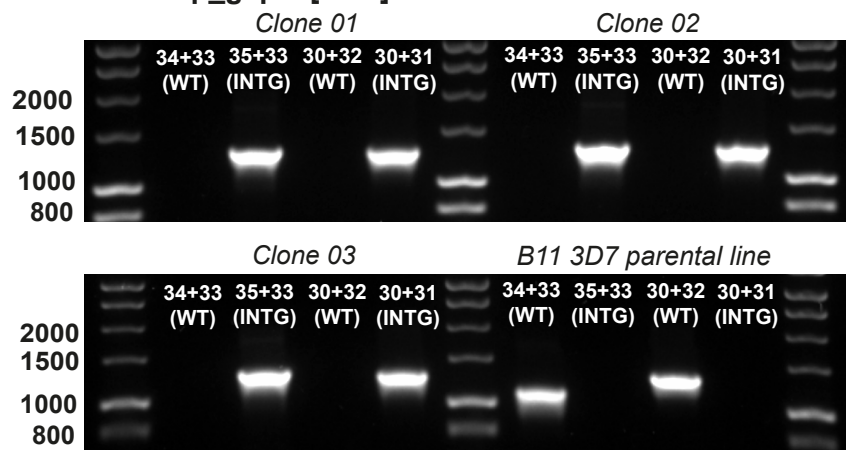

Supplement: pbio.3001408.s008.pdf [file pbio.3001408.s008.pdf]
