# Supplementary material for: Inhibition of protein N-myristoylation blocks Plasmodium falciparum intraerythrocytic development, egress and invasion
Source: PubMed Central journal article supplement (PMC8544853; doi:10.1371/journal.pbio.3001408), 2021-10-25

# A. Excision PCR

complementation pfs47 locus:

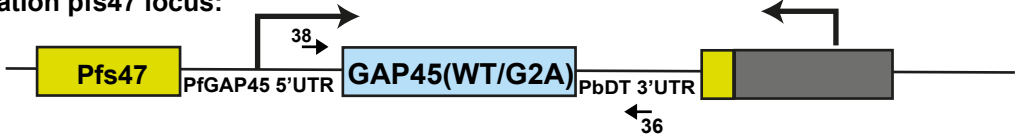

gap45 locus:

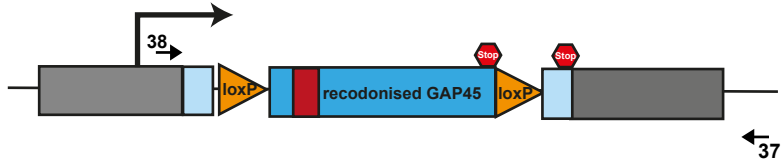

excised gap45 locus:

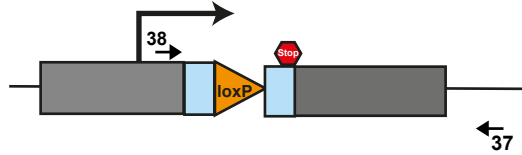

# B.

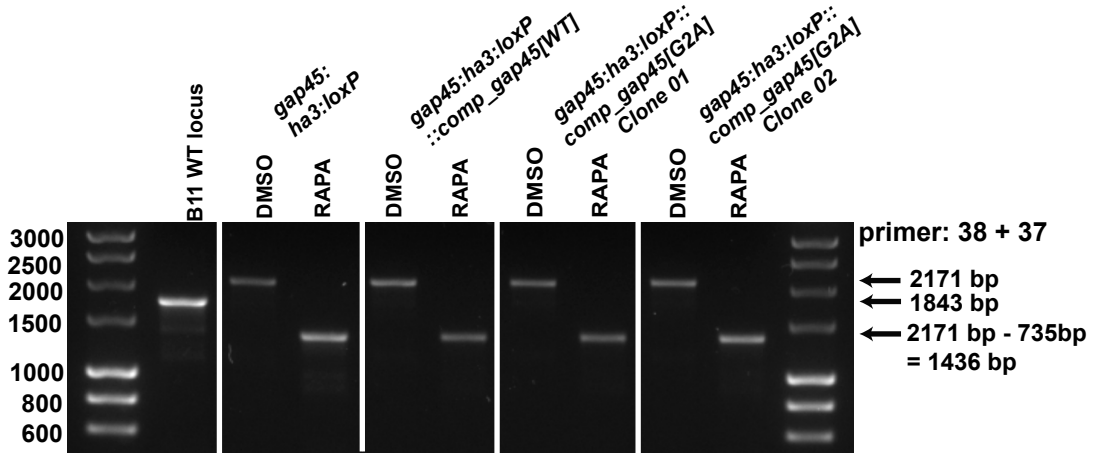

# C.

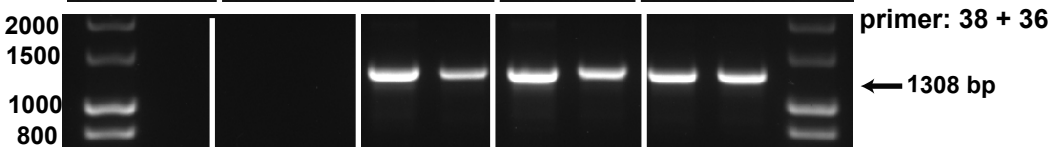

Supplement: pbio.3001408.s009.pdf [file pbio.3001408.s009.pdf]
